# Supplementary material for: The Influence of Weather and Lemmings on Spatiotemporal Variation in the Abundance of Multiple Avian Guilds in the Arctic
Source: PubMed Central journal article supplement (PMC4077800; doi:10.1371/journal.pone.0101495), 2014-07-01
Supplement: pone.0101495.s001.pdf [file pone.0101495.s001.pdf]

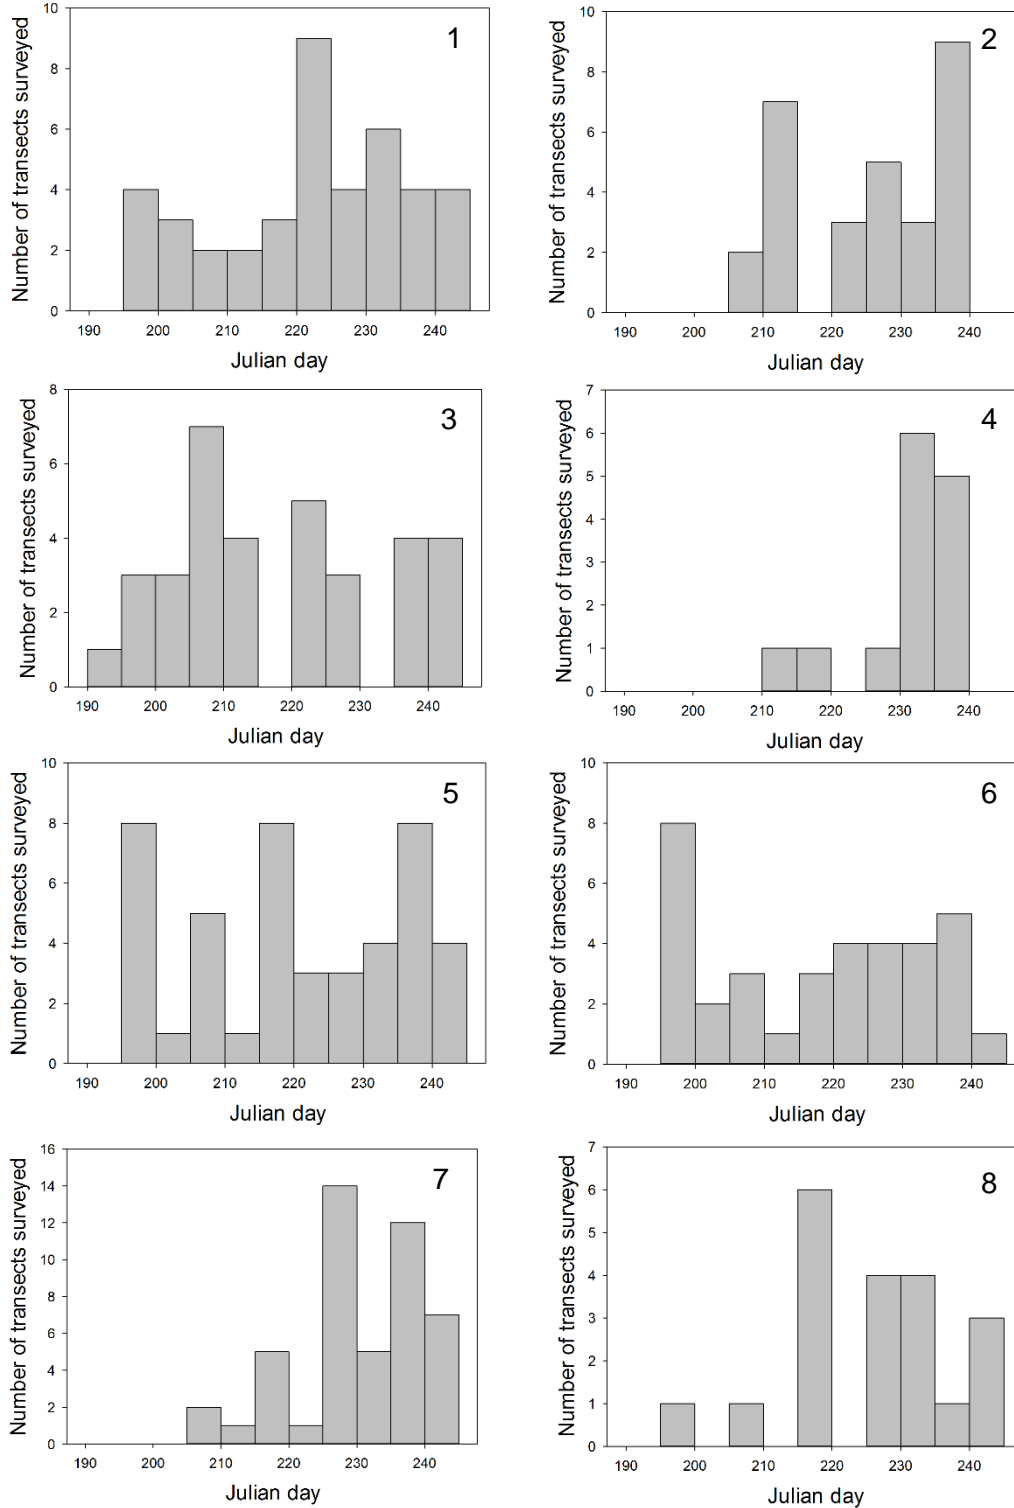

**Figure S1. Frequency distribution of transects surveyed within 5-day periods by strata.** Frequencies shown represent the total number of transects surveyed across years (2010-2012), because relative timing of surveys was consistent throughout the study.
