# Supplementary material for: The Influence of Weather and Lemmings on Spatiotemporal Variation in the Abundance of Multiple Avian Guilds in the Arctic
Source: PubMed Central journal article supplement (PMC4077800; doi:10.1371/journal.pone.0101495), 2014-07-01
Supplement: pone.0101495.s002.pdf [file pone.0101495.s002.pdf]

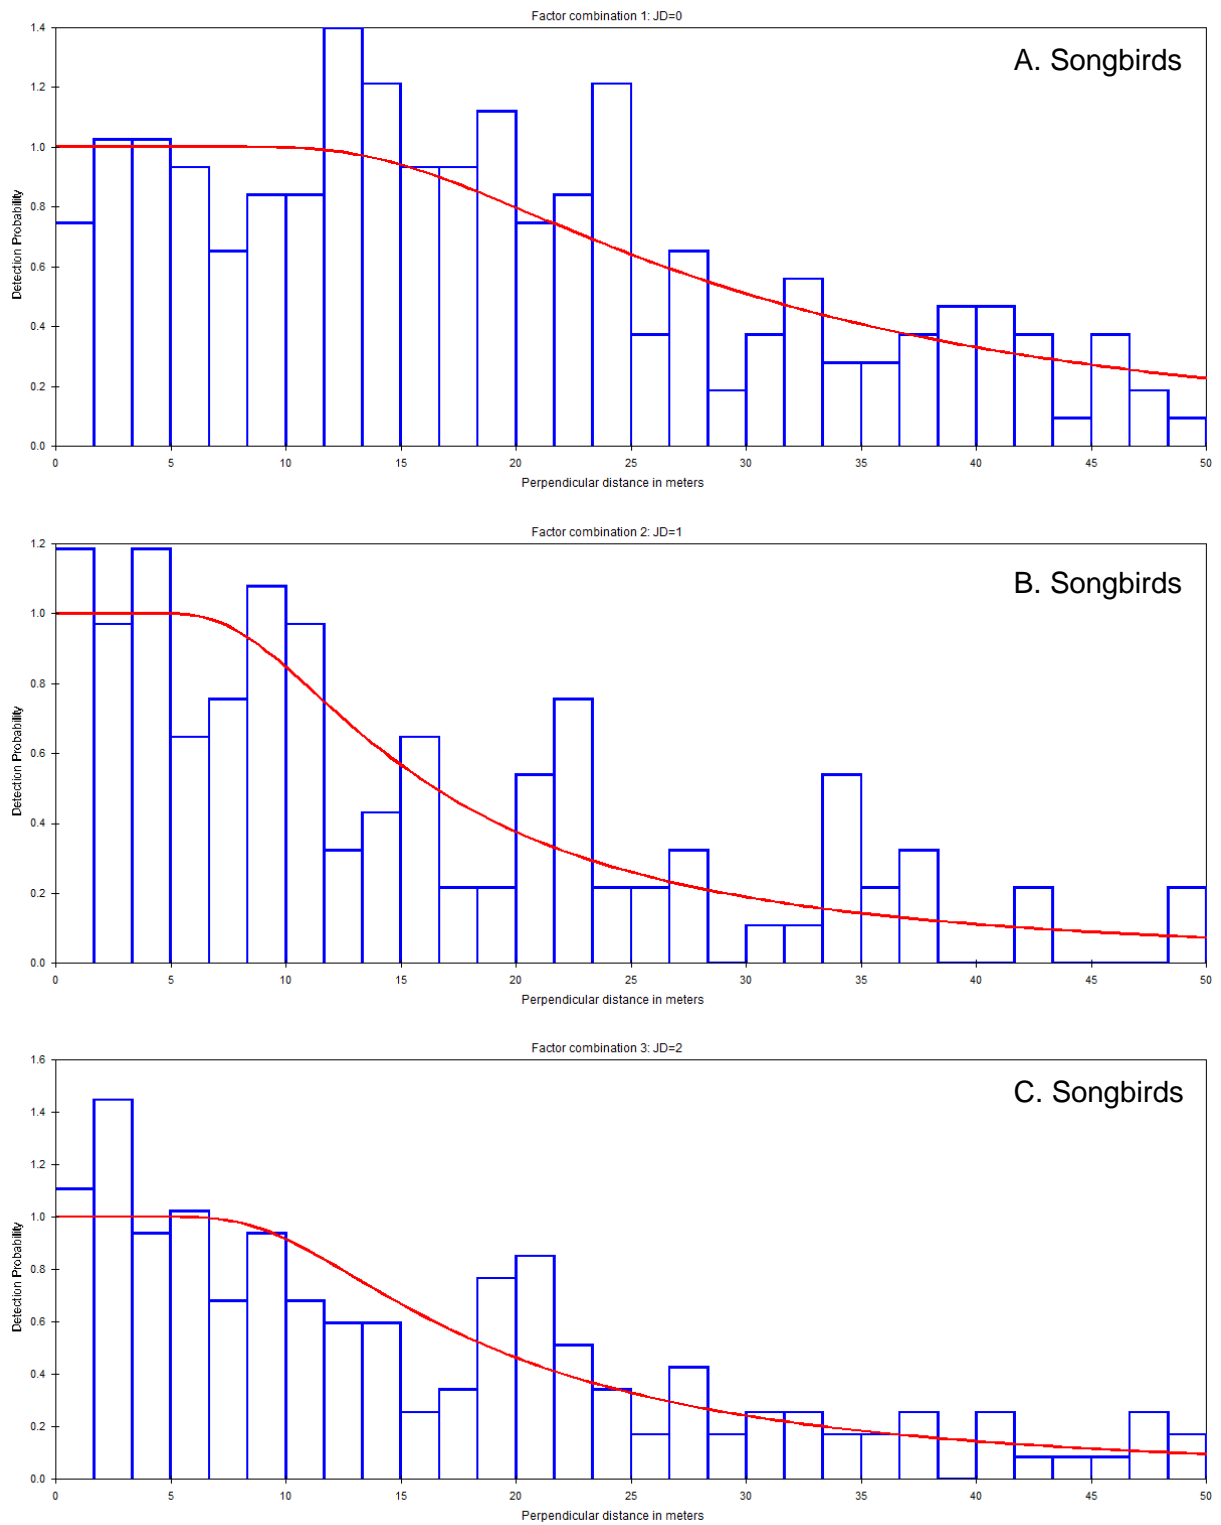

**Figure S2. Estimated detection functions (red lines) and frequency histograms of the actual number of birds observed at different distances from transects (blue bars).** If a covariate was included in the detection function for a guild, a different detection function is shown for each value of the covariate (value shown above the graph). Transects were located on the Coxe Islands, Igoalik Island, and the northern tip of the Melville Peninsula, Nunavut, and surveyed from 12 July – 30 August, 2010 – 2012.

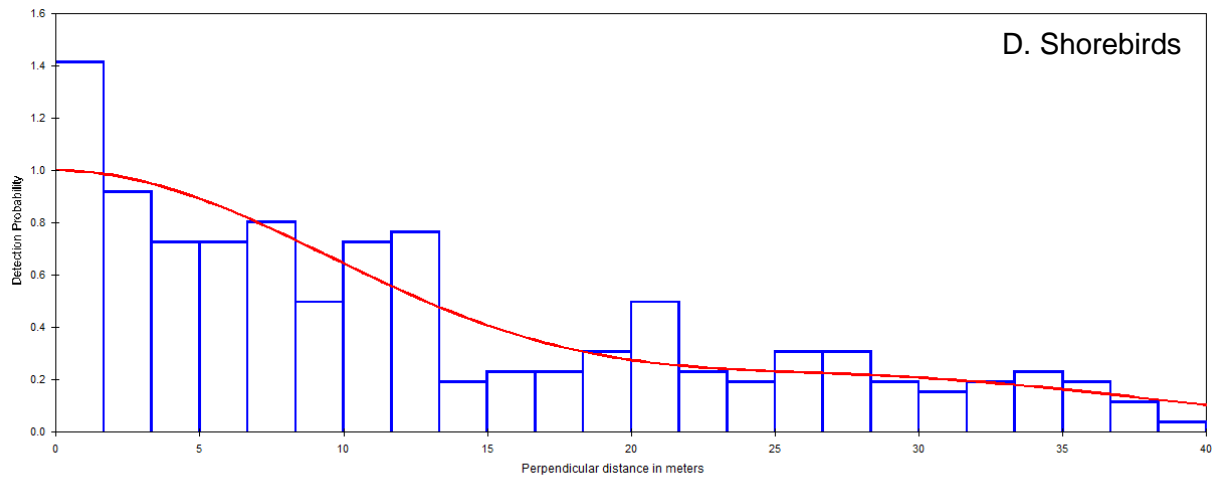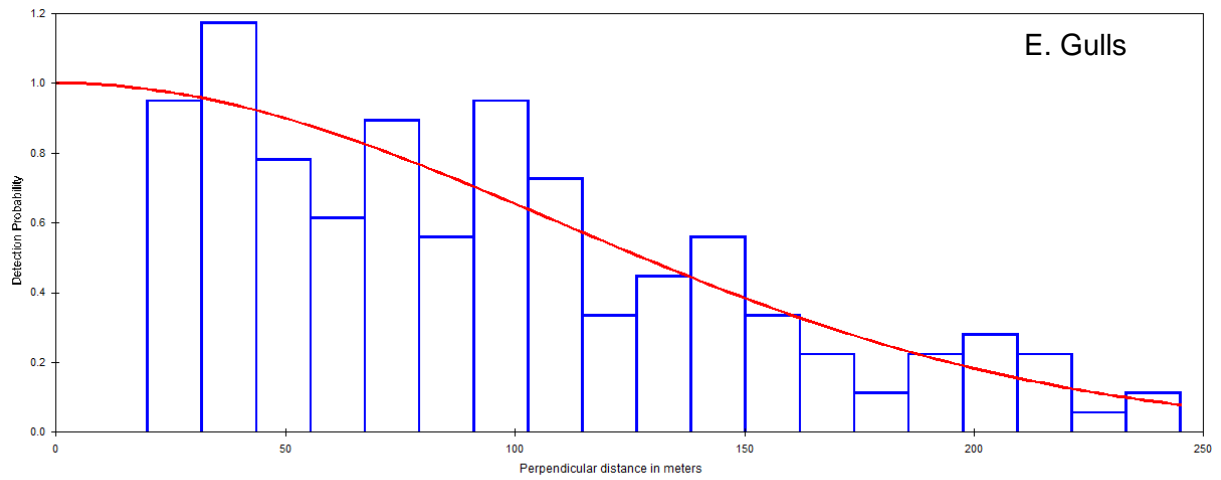

Factor combination 1: YEAR=2010

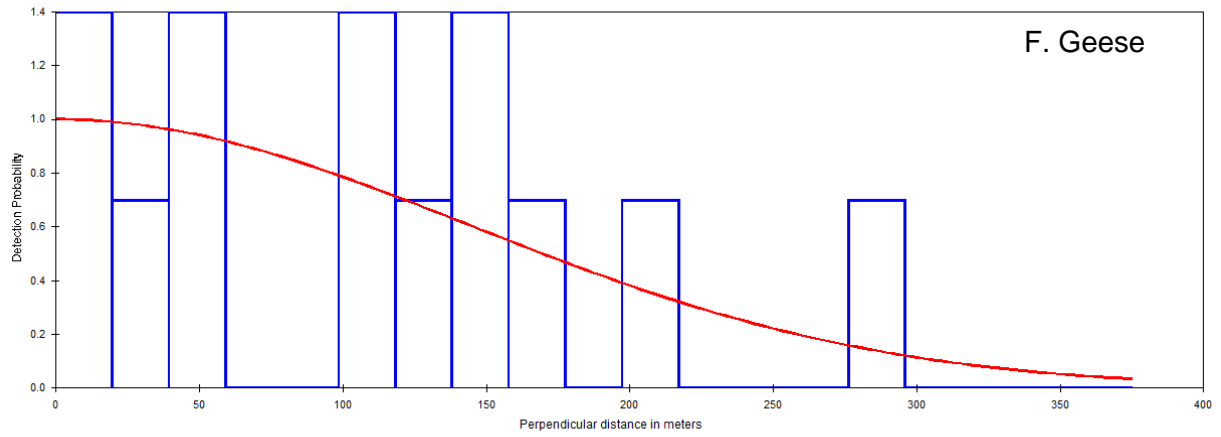

**Figure S2. cont.**

Factor combination 2: YEAR=2011

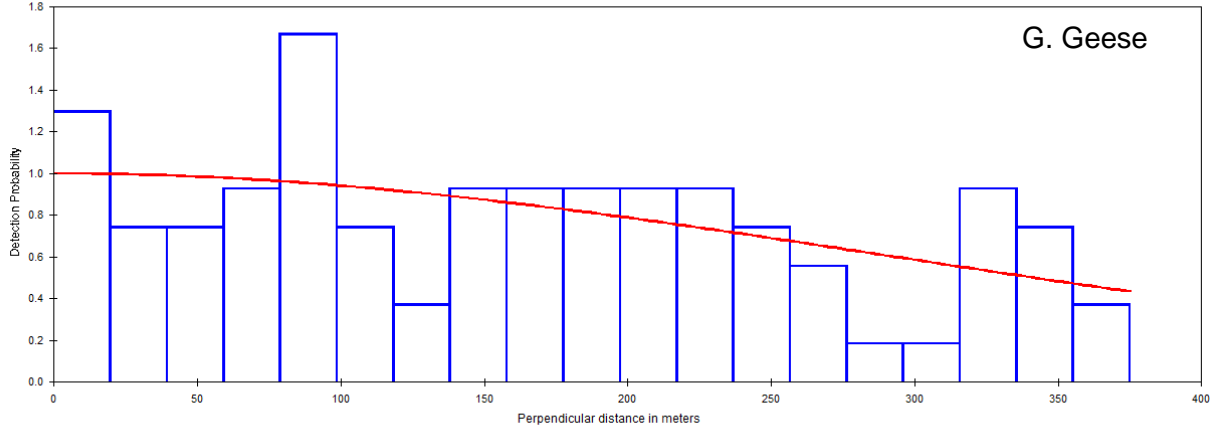

Factor combination 3: YEAR=2012

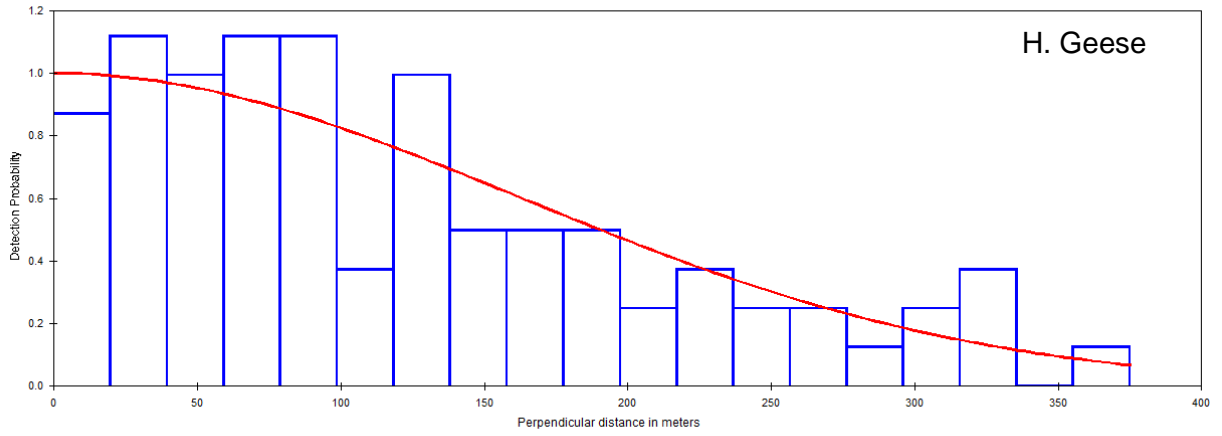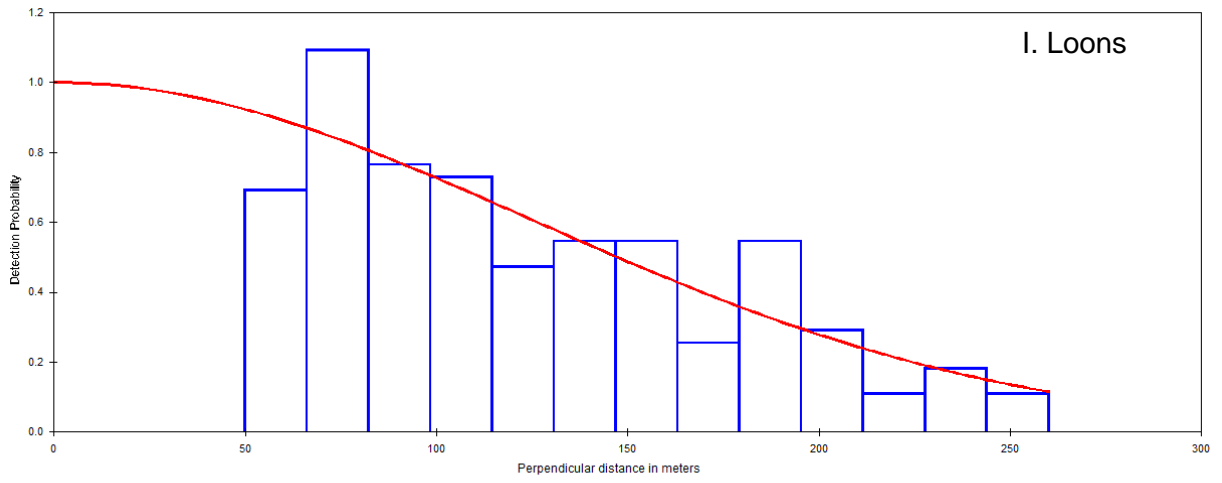

Figure S2. cont.
