# Supplementary material for: The Influence of Weather and Lemmings on Spatiotemporal Variation in the Abundance of Multiple Avian Guilds in the Arctic
Source: PubMed Central journal article supplement (PMC4077800; doi:10.1371/journal.pone.0101495), 2014-07-01
Supplement: pone.0101495.s004.pdf [file pone.0101495.s004.pdf]

**Table S1. List of avian species observed along transects.** Transects were located on the Coxe Islands, Igoolik Island, and the northern tip of the Melville Peninsula, Nunavut, and surveyed from 12 July – 30 August, 2010 – 2012.

| Avian Guild    | Common                  | Scientific                      |
|----------------|-------------------------|---------------------------------|
| Songbirds      | snow bunting            | <i>Plectrophenax nivalis</i>    |
|                | horned lark             | <i>Eremophila alpestris</i>     |
|                | Lapland longspur        | <i>Calcarius lapponicus</i>     |
| Shorebirds     | American pipet          | <i>Anthus rubescens</i>         |
|                | dunlin                  | <i>Calidris alpina</i>          |
|                | red phalarope           | <i>Phalaropus fulicarius</i>    |
|                | red-necked phalarope    | <i>Phalaropus lobatus</i>       |
|                | American golden plover  | <i>Pluvialis dominica</i>       |
|                | black-bellied plover    | <i>Pluvialis squatarola</i>     |
|                | semipalmated plover     | <i>Charadrius semipalmatus</i>  |
|                | Baird's sandpiper       | <i>Calidris bairdii</i>         |
|                | buff-breasted sandpiper | <i>Tryngites subruficollis</i>  |
|                | purple sandpiper        | <i>Calidris maritima</i>        |
|                | stilt sandpiper         | <i>Calidris himantopus</i>      |
| Geese          | white-rumped sandpiper  | <i>Calidris fuscicollis</i>     |
|                | brant                   | <i>Branta bernicla</i>          |
|                | snow goose              | <i>Chen caerulescens</i>        |
|                | Canada goose            | <i>Branta canadensis</i>        |
| Gulls          | tundra swan             | <i>Cygnus columbianus</i>       |
|                | glaucous gull           | <i>Larus hyperboreus</i>        |
|                | herring gull            | <i>Larus argentatus</i>         |
|                | Sabine's gull           | <i>Xema sabini</i>              |
|                | Thayer's gull           | <i>Larus thayeri</i>            |
|                | parasitic jaeger        | <i>Stercorarius parasiticus</i> |
|                | long-tailed jaeger      | <i>Stercorarius longicaudus</i> |
| Loons          | Arctic tern             | <i>Sterna paradisaea</i>        |
|                | common loon             | <i>Gavia immer</i>              |
|                | Pacific loon            | <i>Gavia pacifica</i>           |
|                | red-throated loon       | <i>Gavia stellata</i>           |
| Other          | yellow-billed loon      | <i>Gavia adamsii</i>            |
|                | sandhill crane          | <i>Grus canadensis</i>          |
|                | long-tailed duck        | <i>Clangula hyemalis</i>        |
|                | common eider            | <i>Somateria mollissima</i>     |
|                | king eider              | <i>Somateria spectabilis</i>    |
|                | gyrfalcon               | <i>Falco rusticolus</i>         |
|                | peregrine falcon        | <i>Falco peregrinus</i>         |
|                | black guillemot         | <i>Cepphus grylle</i>           |
|                | rough-legged hawk       | <i>Buteo lagopus</i>            |
| snowy owl      | <i>Bubo scandiacus</i>  |                                 |
| rock ptarmigan | <i>Lagopus muta</i>     |                                 |
|                | common raven            | <i>Corvus corax</i>             |
