# Supplementary material for: The Influence of Weather and Lemmings on Spatiotemporal Variation in the Abundance of Multiple Avian Guilds in the Arctic
Source: PubMed Central journal article supplement (PMC4077800; doi:10.1371/journal.pone.0101495), 2014-07-01
Supplement: pone.0101495.s005.pdf [file pone.0101495.s005.pdf]

**Table S2. Details of the AIC<sub>c</sub> analysis used to choose the most appropriate detection function for each avian guild.**

Birds were surveyed on the Coxe Islands, Igloolik Island and the northern tip of the Melville Peninsula, Nunavut, from 2010-2012. The  $\Delta AIC_c$  value of the model used for each guild is bolded. If multiple models had a  $\Delta AIC_c < 4$ , the model with the least number of parameters was chosen to satisfy the rule of parsimony. Models with no  $\Delta AIC_c$  value (-) did not converge during parameter estimation.

| Key function | Series expansion | # Adjustment terms | Covariates | # Parameters | $\Delta AIC_c$ |             |             |             |             |
|--------------|------------------|--------------------|------------|--------------|----------------|-------------|-------------|-------------|-------------|
|              |                  |                    |            |              | Songbirds      | Shorebirds  | Gulls       | Geese       | Loons       |
| Half Normal  | -                | 0                  | -          | 1            | 9.80           | 15.75       | <b>2.30</b> | 6.39        | <b>0.94</b> |
| Half Normal  | -                | 0                  | Time       | 2            | 6.94           | 17.31       | 4.22        | 8.21        | 0.00        |
| Half Normal  | -                | 0                  | Rugged     | 2            | 9.81           | 16.73       | 0.00        | 6.46        | 1.74        |
| Half Normal  | -                | 0                  | Year       | 3            | 10.93          | 16.00       | 2.49        | <b>0.00</b> | 1.25        |
| Half Normal  | -                | 0                  | Julian Day | 3            | 5.90           | 12.41       | 5.89        | <b>3.71</b> | 2.47        |
| Half Normal  | Cosine           | 1                  | -          | 2            | 8.66           | <b>1.91</b> | 4.28        | 7.56        | 2.93        |
| Half Normal  | Cosine           | 1                  | Time       | 3            | 6.04           | 3.55        | 6.21        | 9.41        | 1.95        |
| Half Normal  | Cosine           | 1                  | Rugged     | 3            | 8.71           | 3.09        | 2.00        | 7.76        | 3.71        |
| Half Normal  | Cosine           | 1                  | Year       | 4            | 9.94           | 2.89        | 4.49        | 1.70        | 7.89        |
| Half Normal  | Cosine           | 1                  | Julian Day | 4            | 5.29           | 0.00        | 7.88        | 5.22        | 4.43        |
| Half Normal  | Hermite Poly.    | 1                  | -          | 2            | 11.71          | 17.66       | 4.29        | 8.35        | 2.94        |
| Half Normal  | Hermite Poly.    | 1                  | Time       | 3            | -              | -           | -           | -           | -           |
| Half Normal  | Hermite Poly.    | 1                  | Rugged     | 3            | -              | -           | 2.00        | -           | -           |
| Half Normal  | Hermite Poly.    | 1                  | Year       | 4            | -              | -           | -           | -           | -           |
| Half Normal  | Hermite Poly.    | 1                  | Julian Day | 4            | -              | -           | -           | -           | -           |
| Hazard Rate  | -                | 0                  | -          | 2            | 9.72           | 2.54        | 4.91        | 7.02        | 2.67        |
| Hazard Rate  | -                | 0                  | Time       | 3            | 9.74           | 8.00        | 6.64        | 8.85        | 5.37        |
| Hazard Rate  | -                | 0                  | Rugged     | 3            | 13.89          | 7.90        | 3.56        | 7.42        | 5.37        |
| Hazard Rate  | -                | 0                  | Year       | 4            | 13.01          | 7.58        | 7.17        | 3.86        | 5.56        |
| Hazard Rate  | -                | 0                  | Julian Day | 4            | <b>0.00</b>    | 7.67        | 8.57        | 5.14        | 7.27        |
| Hazard Rate  | Cosine           | 1                  | -          | 3            | 8.58           | 3.43        | 5.79        | 8.89        | 4.45        |
| Hazard Rate  | Cosine           | 1                  | Time       | 4            | 8.98           | 13.34       | 8.69        | 10.71       | 7.32        |
| Hazard Rate  | Cosine           | 1                  | Rugged     | 4            | 10.01          | 13.31       | 5.11        | 8.87        | 7.32        |
| Hazard Rate  | Cosine           | 1                  | Year       | 5            | 11.94          | 13.47       | 10.67       | 5.54        | 7.89        |
| Hazard Rate  | Cosine           | 1                  | Julian Day | 5            | -              | 13.27       | 10.69       | 7.56        | 9.19        |
| Hazard Rate  | Simply Poly.     | 1                  | -          | 3            | 11.44          | 2.89        | 6.62        | 9.02        | 4.25        |
| Hazard Rate  | Simply Poly.     | 1                  | Time       | 4            | 10.01          | 7.93        | -           | 10.83       | 5.70        |
| Hazard Rate  | Simply Poly.     | 1                  | Rugged     | 4            | 14.82          | 8.10        | 5.16        | 9.32        | 5.77        |
| Hazard Rate  | Simply Poly.     | 1                  | Year       | 5            | 12.40          | 7.79        | 8.61        | 5.52        | 7.13        |
| Hazard Rate  | Simply Poly.     | 1                  | Julian Day | 5            | 0.97           | 8.96        | 9.90        | 7.09        | 5.05        |
